# Supplementary material
Source: MDPI journal article supplement (https://www.mdpi.com/2073-4344/12/2/240)
Supplement: s1 [file s1]

## Supplementary Material

# Highly Efficient Hierarchical Porous Carbon-Supported Pd-Based Catalysts for Additive-Free Dehydrogenation of Formic Acid

Xinyi Miao<sup>1</sup>, Fengwu Tian<sup>1</sup>, Miaomiao Bai<sup>1</sup>, Yujia Zhang<sup>1</sup>, Wei Wang<sup>1</sup>, Zuoping Zhao<sup>1,2</sup>, Xianzhao Shao<sup>1,\*</sup> and Xiaohui Ji<sup>1</sup>

<sup>1</sup> Shaanxi Key Laboratory of Catalysis, School of Chemistry and Environment Science, Shaanxi University of Technology, Hanzhong 723001, China; miaoxinyi000@126.com (X.M.); tianfengwu000@126.com (F.T.); baimiaomiao000@126.com (M.B.); zhangyujia000@126.com (Y.Z.); wangwei@snut.edu.cn (W.W.); zhaozuoping@126.com (Z.Z.); slgjxh@163.com (X.J.)

<sup>2</sup> State Key Laboratory of Qinba Bio-Resource and Ecological Environment, Shaanxi University of Technology, Hanzhong 723001, China

\* Correspondence: xianzhaoshao@snut.edu.cn; Tel.: +869-162-641-660

**Abstract:** Formic acid (FA) is one of the most prospective hydrogen carriers for renewable energy transformation. In this context, the addition of extra-amine is always required for promoting the reactivity of FA, which is still a key challenge. Herein, we report a simple but effective strategy to synthesize Pd nanoparticles, supported on NH<sub>2</sub>-functionalized, phosphorous-doped glucose-based porous carbon (NH<sub>2</sub>-P-GC). The introduction of NH<sub>2</sub>- groups on the support acts as an immobilized amine-additive for FA dehydrogenation, while phosphorus not only serves as an electronic promoter to keep Pd in the electronic deficient state for FA dehydrogenation, but also as an enlarger of the aperture size of the carbon. As a result, the Pd/NH<sub>2</sub>-P-GC has exceptional catalytic activity, 100% H<sub>2</sub> selectivity, CO generation that is undetectable, and good reusability for hydrogen production from FA. In the additive-free dehydrogenation of aqueous FA solution, the initial turnover frequency (TOF) can reach 5126 h<sup>-1</sup> at room temperature, which is substantially higher than the best heterogeneous catalyst so far recorded. Overall, the system's high activity, selectivity, stability, and simplicity in producing CO-free H<sub>2</sub>/CO<sub>2</sub> gas from FA, without the need for any additive, makes it attractive for practical deployment.

**Keywords:** formic acid; dehydrogenation; amine functionalization; porous carbon; palladium nanoparticles

**Citation:** Miao, X.; Tian, F.; Bai, M.; Zhang, Y.; Wang, W.; Zhao, Z.; Shao, X.; Ji, X. Highly Efficient Hierarchical Porous Carbon Supported Pd-Based Catalysts for Additive-Free Dehydrogenation of Formic Acid. *Catalysts* **2022**, *12*, 240. <https://doi.org/10.3390/catal12020240>

Academic Editor: Vincenzo Vaiano

Received: 1 February 2022

Accepted: 17 February 2022

Published: 20 February 2022

**Publisher's Note:** MDPI stays neutral with regard to jurisdictional claims in published maps and institutional affiliations.

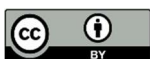

**Copyright:** © 2022 by the authors. Licensee MDPI, Basel, Switzerland. This article is an open access article distributed under the terms and conditions of the Creative Commons Attribution (CC BY) license (<http://creativecommons.org/licenses/by/4.0/>).

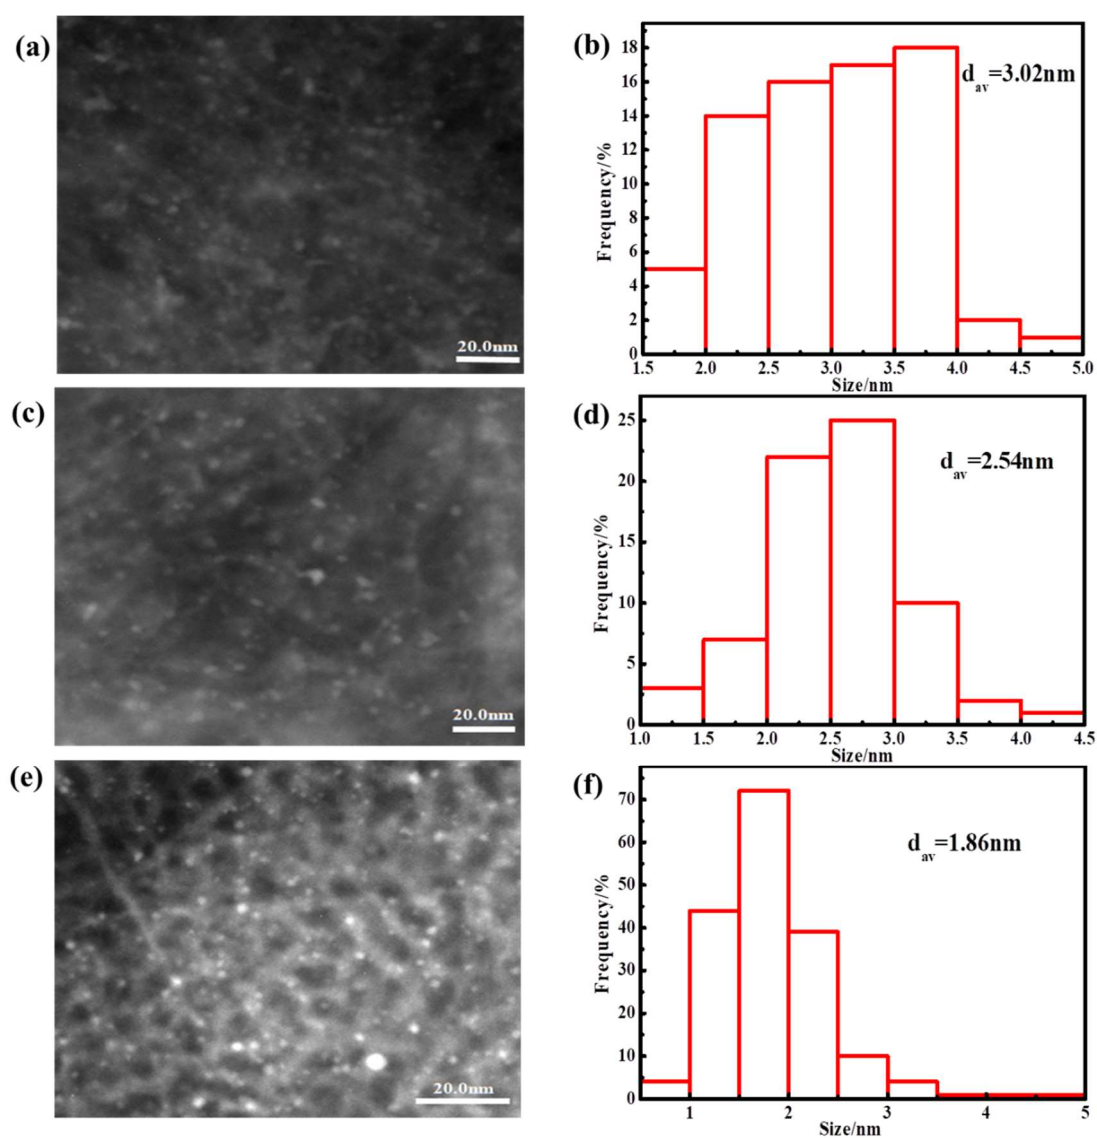

**Figure S1.** HRTEM image and histograms with Pd nanoparticle size distributions of Pd/P-GC (a,b); Pd/NH<sub>2</sub>-GC (c,d) and Pd/NH<sub>2</sub>-P-GC-Used (e,f).

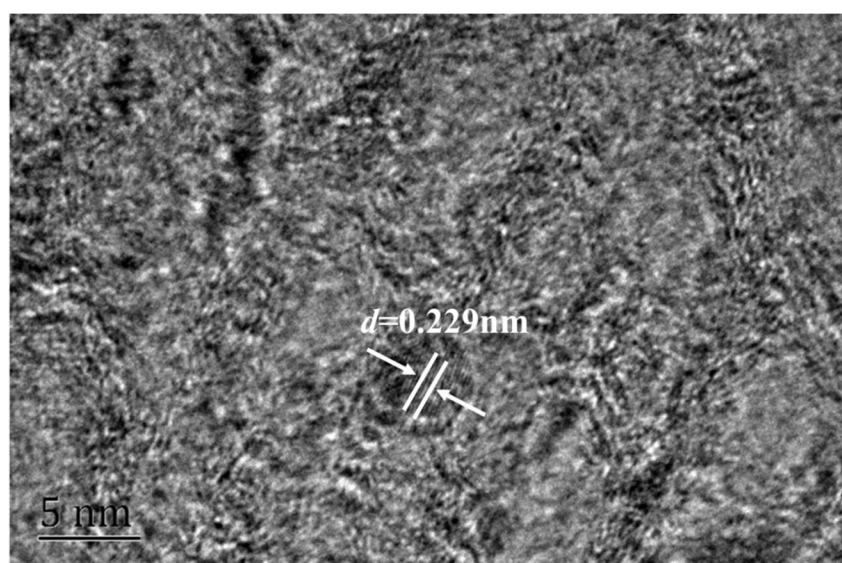

**Figure S2.** HRTEM image and corresponding FFT pattern of Pd/NH<sub>2</sub>-P-GC.

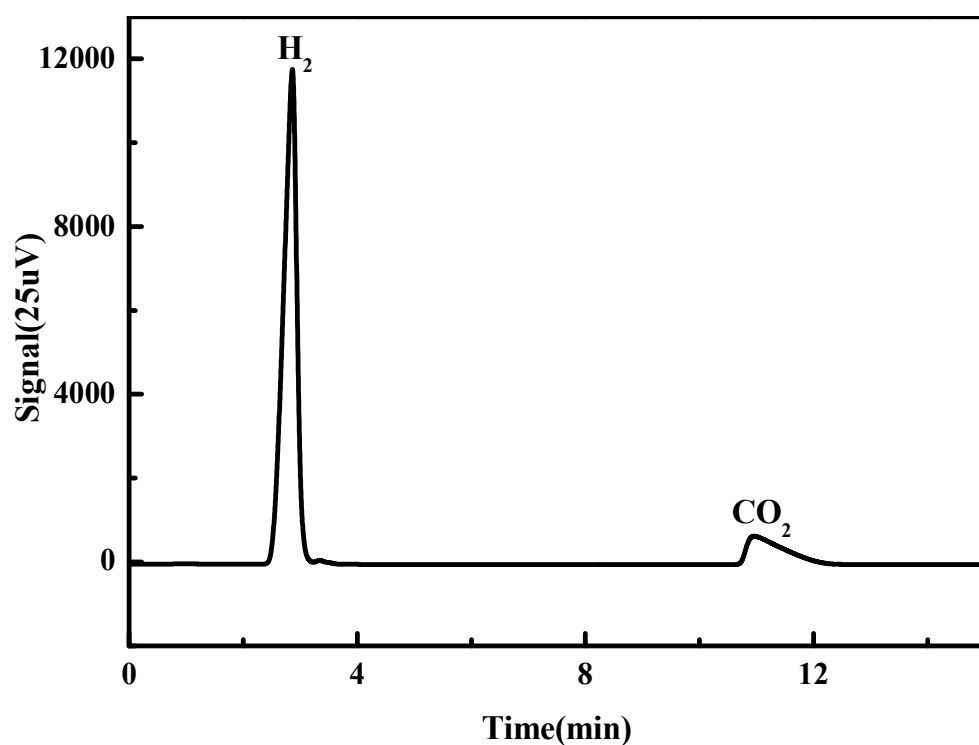

**Figure S3.** GC spectrum using TCD for the evolved gas from FA aqueous solution (1.0 M, 5.0 mL) over Pd/NH<sub>2</sub>-P-GC hybrid at 298 K. ( $n_{\text{metal}}/n_{\text{FA}} = 0.0037$ ).

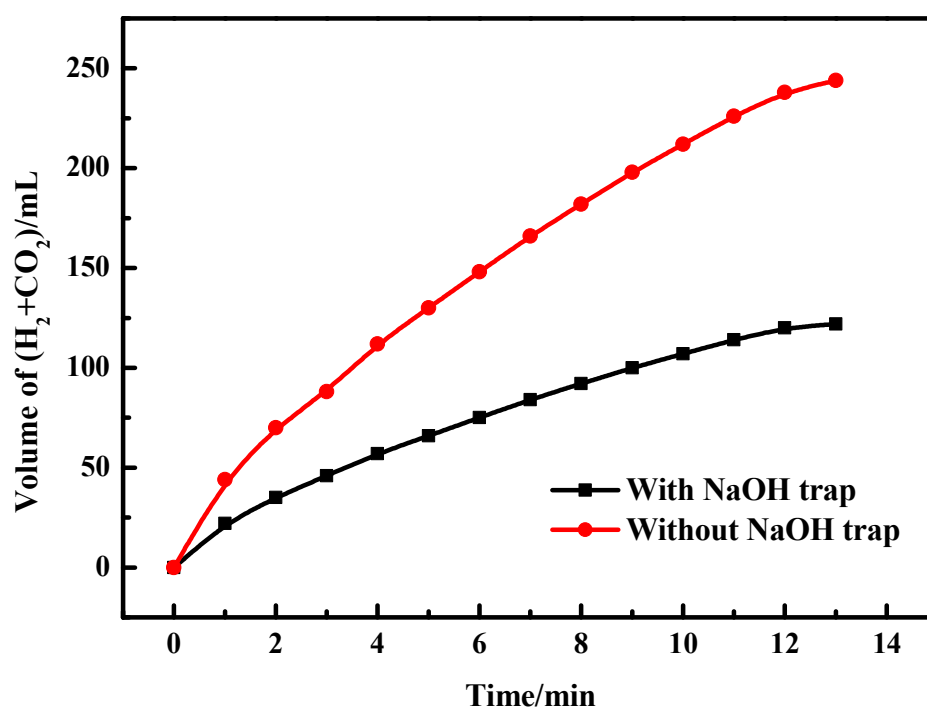

**Figure S4.** Volume of generated gas (H<sub>2</sub> + CO<sub>2</sub>) versus time for the dehydrogenation of FA (1.0 M, 5.0 mL) without additive at 298 K over Pd/NH<sub>2</sub>-P-GC with/without 10M NaOH trap. ( $n_{\text{metal}}/n_{\text{FA}} = 0.0037$ ).

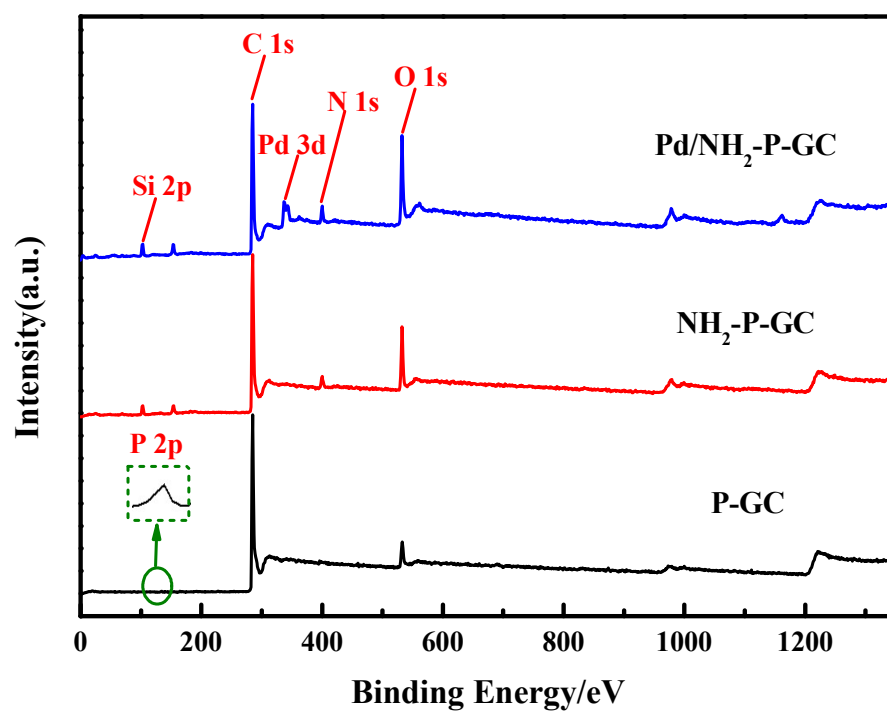

Figure S5. XPS survey spectra of Pd/NH<sub>2</sub>-P-GC, NH<sub>2</sub>-P-GC and P-GC.

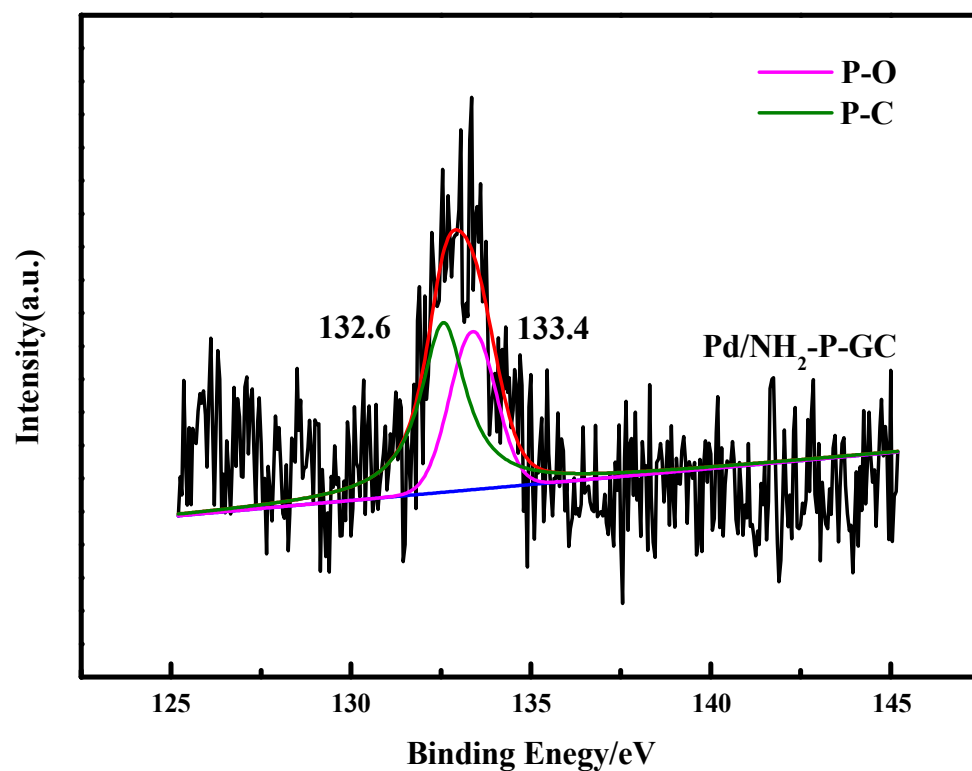

Figure S6. High-resolution XPS spectra of P 2p in Pd/NH<sub>2</sub>-P-GC.

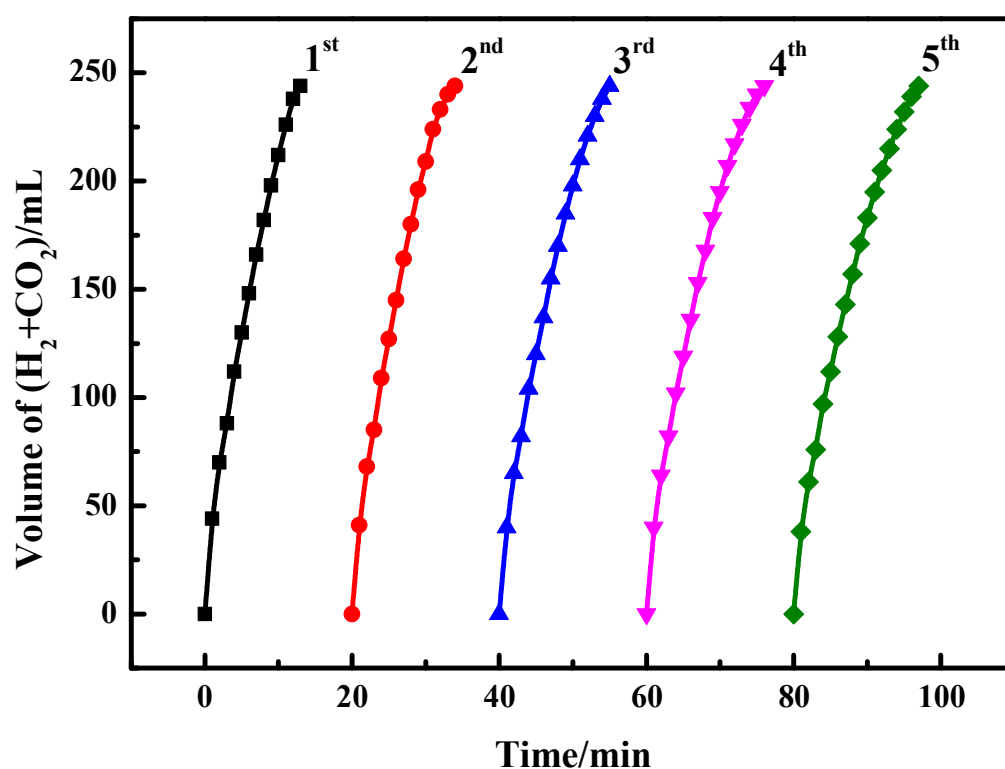

**Figure S7.** Recyclability of Pd/NH<sub>2</sub>-P-GC for FA dehydrogenation.

**Table S1.** ICP-OES (Pd) and XPS analyses (P, N, C, and Si) for Pd/NH<sub>2</sub>-P-GC before/after dehydrogenation reaction.

| Conditions             | Pd (wt%) | P (at%) | N (at%) | C (at%) | Si (at%) |
|------------------------|----------|---------|---------|---------|----------|
| Fresh prepared         | 2.10     | 0.53    | 5.97    | 75.98   | 6.05     |
| After reusability test | 2.12     | 0.45    | 3.89    | 78.98   | 5.12     |

**Table S2.** Initial TOF values for the decomposition of FA without additive over various heterogeneous catalysts.

| Catalyst                                                    | Additive (mmol) | Tem. (K) | TOF <sub>initial</sub> (mol H <sub>2</sub> mol catalyst <sup>-1</sup> h <sup>-1</sup> ) | Ea (kJ mol <sup>-1</sup> ) | Ref.             |
|-------------------------------------------------------------|-----------------|----------|-----------------------------------------------------------------------------------------|----------------------------|------------------|
| Ni <sub>0.4</sub> Pd <sub>0.6</sub> /NH <sub>2</sub> -N-rGO | None            | 298      | 954.3                                                                                   | -                          | 1                |
| AuPd-MnOx/ZIF-8-rGO                                         | None            | 298      | 660.7                                                                                   | -                          | 2                |
| CoAuPd/C                                                    | None            | 298      | 80.0                                                                                    | -                          | 3                |
| Ni <sub>0.4</sub> Au <sub>0.15</sub> Pd <sub>0.45</sub> /C  | None            | 298      | 12.4                                                                                    | -                          | 4                |
| Au@Pd/N-mrGO                                                | None            | 298      | 109.3                                                                                   | -                          | 5                |
| CoAuPd/DNA-rGO                                              | None            | 298      | 104.4                                                                                   | -                          | 6                |
| PdAu-MnOx/N-SiO <sub>2</sub>                                | None            | 298      | 785                                                                                     | 26.2                       | 7                |
| Pd <sub>60</sub> Au <sub>40</sub> /ZrSBA-15-AP              | None            | 298      | 1185                                                                                    | 42.5                       | 8                |
| CrAuPd/N-SiO <sub>2</sub>                                   | None            | 298      | 730                                                                                     | 49.8                       | 9                |
| Pd/IMIP-1                                                   | None            | 298      | 356                                                                                     | 46.5                       | 10               |
| Pd/mpg-C <sub>3</sub> N <sub>4</sub>                        | None            | 298      | 144                                                                                     | 29.1                       | 11               |
| AgPd                                                        | None            | 298      | 150                                                                                     | 22.0                       | 12               |
| PdAg-MnOx/N-SiO <sub>2</sub>                                | None            | 298      | 482                                                                                     | 72.4                       | 13               |
| Ag@Pd/C                                                     | None            | 298      | 96                                                                                      | -                          | 14               |
| Au <sub>0.5</sub> Pd <sub>0.5</sub> /NH <sub>2</sub> -N-rGO | None            | 298      | 4446                                                                                    | -                          | 15               |
| Pd <sub>60</sub> Au <sub>40</sub> /HPC-NH <sub>2</sub>      | None            | 298      | 3763                                                                                    | 64.8                       | 16               |
| Ag <sub>1</sub> Pd <sub>4</sub> /UiO-66                     | None            | 298      | 107                                                                                     | 29.66                      | 17               |
| Pd/CN <sub>0.25</sub>                                       | None            | 298      | 752                                                                                     | 48.8                       | 18               |
| Pd/NMC-400                                                  | None            | 298      | 913                                                                                     | 36.9                       | 19               |
| Pd/NHPC-NH <sub>2</sub>                                     | None            | 298      | 1265                                                                                    | 46.3                       | 20               |
| AP-SiO <sub>2</sub> @PDA-NGO@Pd                             | None            | 298      | 1588                                                                                    | 51.5                       | 21               |
| IrPdAu/NH <sub>2</sub> -SBA-15                              | None            | 298      | 4737                                                                                    | 30.14                      | 22               |
| Pd/NH <sub>2</sub> -P-GC                                    | None            | 298      | 5126                                                                                    | 22.44                      | <b>This work</b> |

## References

- [1] Yan, J. M., Li, S. J., Yi, S. S., Wulan, B. R., Zheng, W. T., Jiang, Q. Anchoring and upgrading ultrafine NiPd on room-temperature-synthesized bifunctional  $\text{NH}_2$ -N-rGO toward low-cost and highly efficient catalysts for selective formic acid dehydrogenation. *Adv. Mater.*, 2018, 30, 1703038.
- [2] Yan, J. M., Wang, Z. L., Gu, L., Li, S. J., Wang, H. L., Zheng, W. T., Jiang, Q. AuPd–MnOx/MOF–graphene: an efficient catalyst for hydrogen production from formic acid at room temperature. *Adv. Energy Mater.*, 2015, 5, 1500107.
- [3] Wang, Z. L., Yan, J. M., Ping, Y., Wang, H. L., Zheng, W. T., Jiang, Q. An efficient CoAuPd/C catalyst for hydrogen generation from formic acid at room temperature. *Angew. Chem.*, 2013, 125, 4502–4505.
- [4] Wang, Z. L., Ping, Y., Yan, J. M., Wang, H. L., Jiang, Q. Hydrogen generation from formic acid decomposition at room temperature using a NiAuPd alloy nanocatalyst. *Int. J. Hydrog. Energy*, 2014, 39, 4850–4856.
- [5] Wang, Z. L., Yan, J. M., Wang, H. L., Ping, Y., Jiang, Q. Au@Pd core–shell nanoclusters growing on nitrogen-doped mildly reduced graphene oxide with enhanced catalytic performance for hydrogen generation from formic acid. *J. Mater. Chem. A*, 2013, 1, 12721–12725.
- [6] Wang, Z. L., Wang, H. L., Yan, J. M., Ping, Y., Song-II, O., Li, S. J., Jiang, Q. DNA-directed growth of ultrafine CoAuPd nanoparticles on graphene as efficient catalysts for formic acid dehydrogenation. *Chem. Commun.*, 2014, 50, 2732–2734.
- [7] Karatas, Y., Bulut, A., Yurderi, M., Ertas, I. E., Alal, O., Gulcan, M., Zahmakiran, M. PdAu–MnOx nanoparticles supported on amine-functionalized  $\text{SiO}_2$  for the room temperature dehydrogenation of formic acid in the absence of additives. *Appl. Catal. B Environ.*, 2016, 180, 586–595.
- [8] Wang, Z., Hao, X., Hu, D., Li, L., Song, X., Zhang, W. PdAu bimetallic nanoparticles anchored on amine-modified mesoporous ZrSBA-15 for dehydrogenation of formic acid under ambient conditions. *Catal. Sci. Technol.*, 2017, 7, 2213–2220.
- [9] Yurderi, M., Bulut, A., Caner, N., Celebi, M., Kaya, M., Zahmakiran, M. Amine grafted silica supported CrAuPd alloy nanoparticles: superb heterogeneous catalysts for the room temperature dehydrogenation of formic acid. *Chem. Commun.*, 2015, 51, 11417–11420.
- [10] Ziaee, M. A., Zhong, H., Cui, C., Wang, R. Additive-free hydrogen generation from formic acid boosted by amine-functionalized imidazolium-based ionic polymers. *ACS Sustainable Chem. Eng.*, 2018, 6, 10421–10428.
- [11] Lee, J. H., Ryu, J., Kim, J. Y., Nam, S. W., Han, J. H., Lim, T. H., Yoon, C. W. Carbon dioxide mediated, reversible chemical hydrogen storage using a Pd nanocatalyst supported on mesoporous graphitic carbon nitride. *J. Mater. Chem. A*, 2014, 2, 9490–9495.
- [12] Zhang, S., Metin, Ö., Su, D., Sun, S. Monodisperse AgPd alloy nanoparticles and their superior catalysis for the dehydrogenation of formic acid. *Angew. Chem. Int. Ed.*, 2013, 52(13), 3681–3684.
- [13] Caner, N., Bulut, A., Yurderi, M., Ertas, I. E., Kivrak, H., Kayac, M., Zahmakiran, M. Atomic layer deposition- $\text{SiO}_2$  layers protected PdCoNi nanoparticles supported on  $\text{TiO}_2$  nanopowders: exceptionally stable nanocatalyst for the dehydrogenation of formic acid. *Appl. Catal. B: Environ.*, 2017, 210, 470–483.
- [14] Tedsree, K., Li, T., Jones, S., Chan, C. W. A., Yu, K. M. K., Bagot, P. A., Tsang, S. C. E. Hydrogen production from formic acid decomposition at room temperature using a Ag–Pd core–shell nanocatalyst. *Nat. Nanotechnol.*, 2011, 6(5), 302–307.
- [15] Li, S. J., Zhou, Y. T., Kang, X., Liu, D. X., Gu, L., Zhang, Q. H., Yan, J. M., Jiang, Q. A simple and effective principle for a rational design of heterogeneous catalysts for dehydrogenation of formic acid. *Adv. Mater.*, 2019, 31, 1806781.
- [16] Wang, Z., Liang, S., Meng, X., Mao, S., Lian, X., Wang, Y. Ultrasmall PdAu alloy nanoparticles anchored on amine-functionalized hierarchically porous carbon as additive-free catalysts for highly efficient dehydrogenation of formic acid. *Appl. Catal. B Environ.*, 2021, 291, 120140.
- [17] Gao, S., Liu, W., Feng, C., Shang, N., Wang, C. A Ag–Pd alloy supported on an amine-functionalized UiO-66 as an efficient synergistic catalyst for the dehydrogenation of formic acid at room temperature. *Catal. Sci. Technol.*, 2016, 6, 869–874.

- [18] Bi, Q. Y., Lin, J. D., Liu, Y. M., He, H. Y., Huang, F. Q., Cao, Y. Dehydrogenation of formic acid at room temperature: boosting palladium nanoparticle efficiency by coupling with pyridinic-nitrogen-doped carbon. *Angew. Chem. Int. Ed.*, 2016, 55, 1–6.
- [19] Sun, J., Qiu, H., Cao, W., Fu, H., Wan, H., Xu, Z., Zheng, S. Ultrafine Pd particles embedded in nitrogen-enriched mesoporous carbon for efficient H<sub>2</sub> production from formic acid decomposition. *ACS Sustain. Chem. Eng.*, 2019, 7 (2), 1963–1972.
- [20] Wang, Z., Wang, C., Mao, S., Gong, Y., Chen, Y., Wang, Y. Pd nanoparticles anchored on amino-functionalized hierarchically porous carbon for efficient dehydrogenation of formic acid under ambient conditions. *J. Mater. Chem. A*, 2019, 7 (45), 25791–25795.
- [21] Ye, W., Pei, W., Zhou, S., Huang, H., Li, Q., Zhao, J., Lu, R., Ge, Y., Zhang, S. Controlling the synthesis of uniform electron-deficient Pd clusters for superior hydrogen production from formic acid. *J. Mater. Chem. A*, 2019, 7(17), 10363–10371.
- [22] Luo, Y. X., Yang, Q. F., Nie, W. D., Yao, Q. L., Zhang, Z. J., Lu, Z. H. Anchoring IrPdAu nanoparticles on NH<sub>2</sub>-SBA-15 for fast hydrogen production from formic acid at room temperature. *ACS Appl. Mater. Interfaces*, 2020, 12, 7, 8082–8090.
